# Supplementary material
Source: MDPI journal article supplement (https://www.mdpi.com/2311-5629/9/4/92)
Supplement: s1 [file s1 › carbon-2623321-supplementary.pdf]

# Density Functional Theory Analysis of the Impact of Boron Concentration and Surface Oxidation in Boron-Doped Graphene for Sodium and Aluminum Storage

Supplementary Information

M.S. Ritopečki<sup>1</sup>, N.V. Skorodumova<sup>2</sup>, A.S. Dobrota<sup>1</sup>✉, I.A. Pašti<sup>1</sup>✉

<sup>1</sup> University of Belgrade - Faculty of Physical Chemistry, Studentski trg 12-16, 11158 Belgrade, Serbia

<sup>2</sup> Department of Materials Science and Engineering, School of Industrial Engineering and Management, KTH - Royal Institute of Technology, Brinellvägen 23, 100 44 Stockholm, Sweden

✉ Corresponding authors:

Dr. Ana S. Dobrota, Assistant Professor

University of Belgrade – Faculty of Physical Chemistry

Studentski Trg 12-16, 11158 Belgrade, Serbia

[ana.dobrota@ffh.bg.ac.rs](mailto:ana.dobrota@ffh.bg.ac.rs)

Dr. Igor A. Pašti, Full Professor

University of Belgrade – Faculty of Physical Chemistry

Studentski Trg 12-16, 11158 Belgrade, Serbia

[igor@ffh.bg.ac.rs](mailto:igor@ffh.bg.ac.rs)

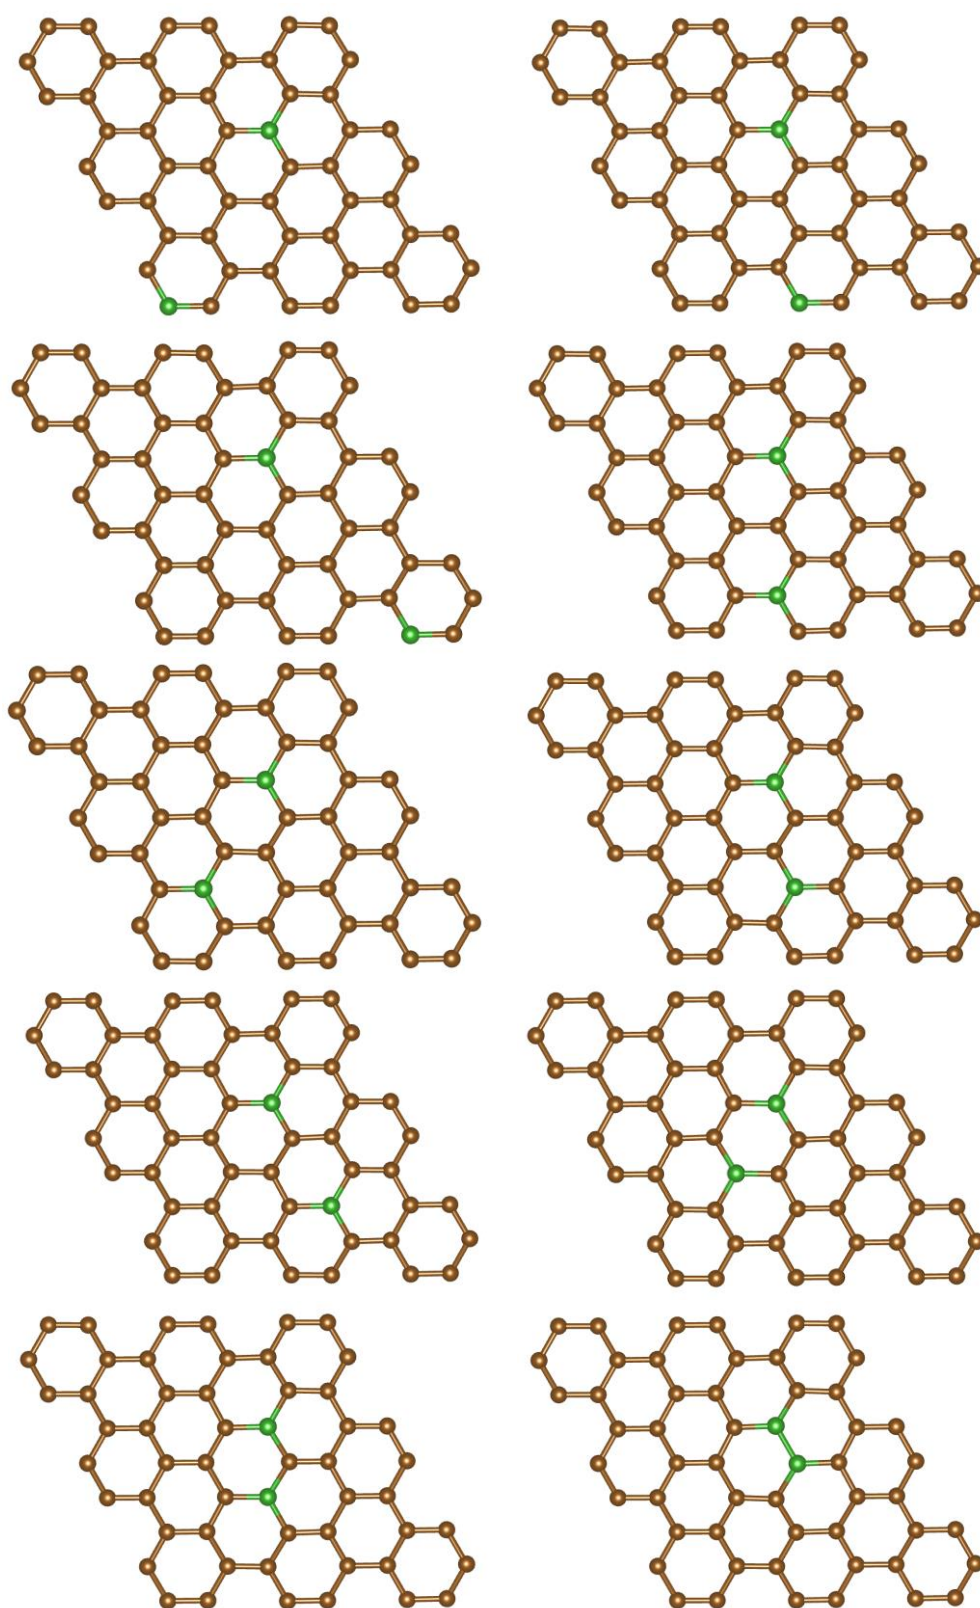

**Figure S1.** Investigated configurations of  $C_{52}B_2$ .

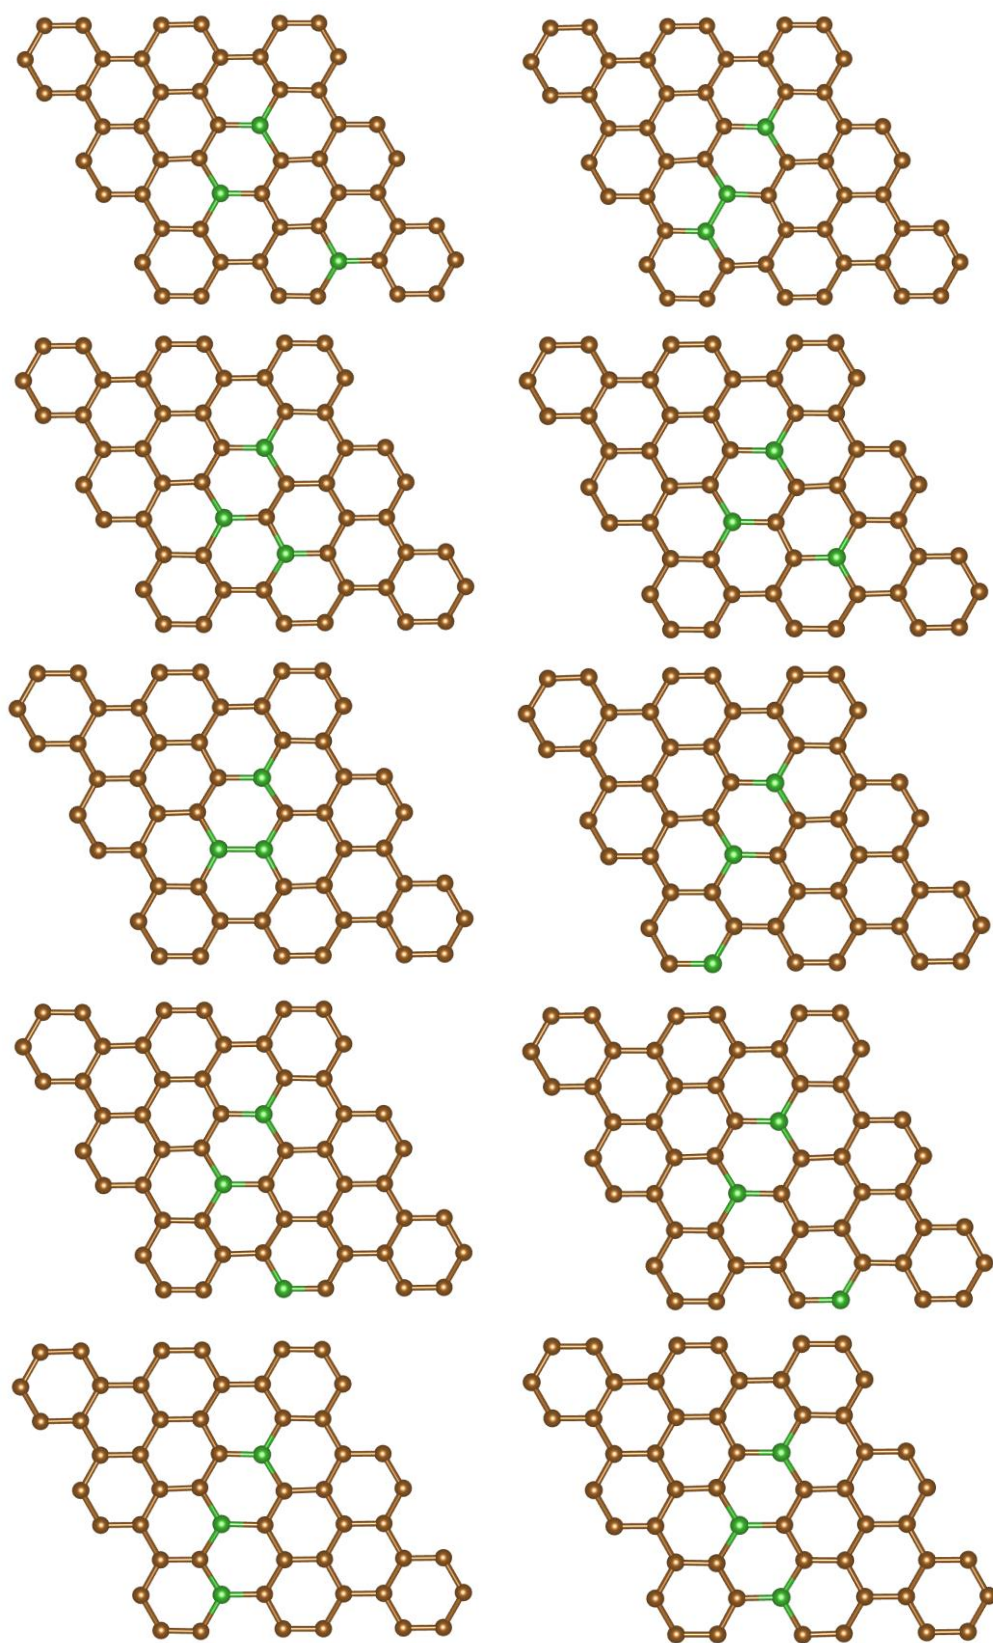

**Figure S2.** Investigated configurations of  $C_{51}B_3$ .

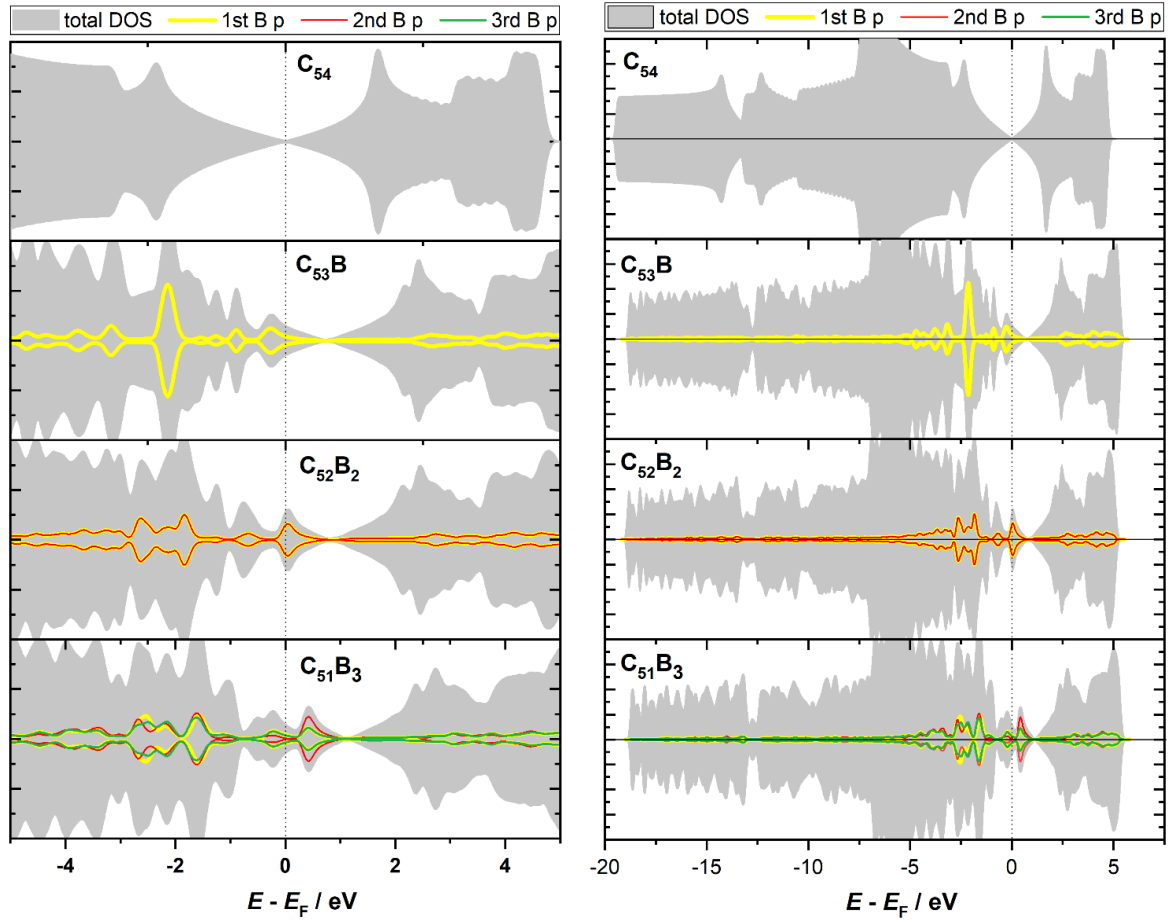

**Fig. S3.** Electronic structures (total DOS) of pristine graphene ( $C_{54}$ , first row) and investigated boron-doped graphenes  $C_{54-n}B_n$  (bottom three rows), zoomed in to the range from  $-5$  to  $+5$  eV (left) and in full energy range (right). The p states of boron dopant atoms are shown separately (in case of  $C_{52}B_2$ , the p states of two B atoms overlap). For clarity, all total DOS plots are divided by 5. The Fermi level (dashed, black line) is set to 0.

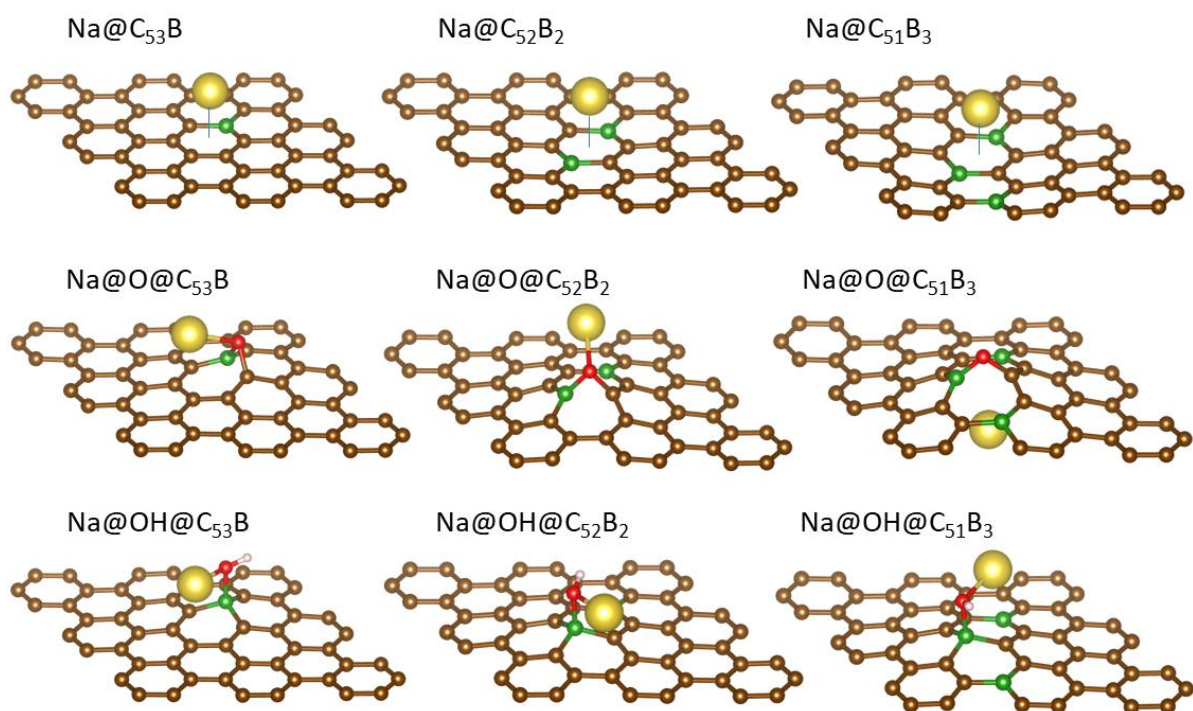

**Fig. S4.** Optimized structures of Na adsorption onto (oxidized) C<sub>54-n</sub>B<sub>n</sub> systems (first row: bare C<sub>54-n</sub>B<sub>n</sub>, middle row C<sub>54-n</sub>B<sub>n</sub> oxidized by O<sub>ads</sub>, bottom row C<sub>54-n</sub>B<sub>n</sub> oxidized by OH<sub>ads</sub>). Graphical representations was made using VESTA.

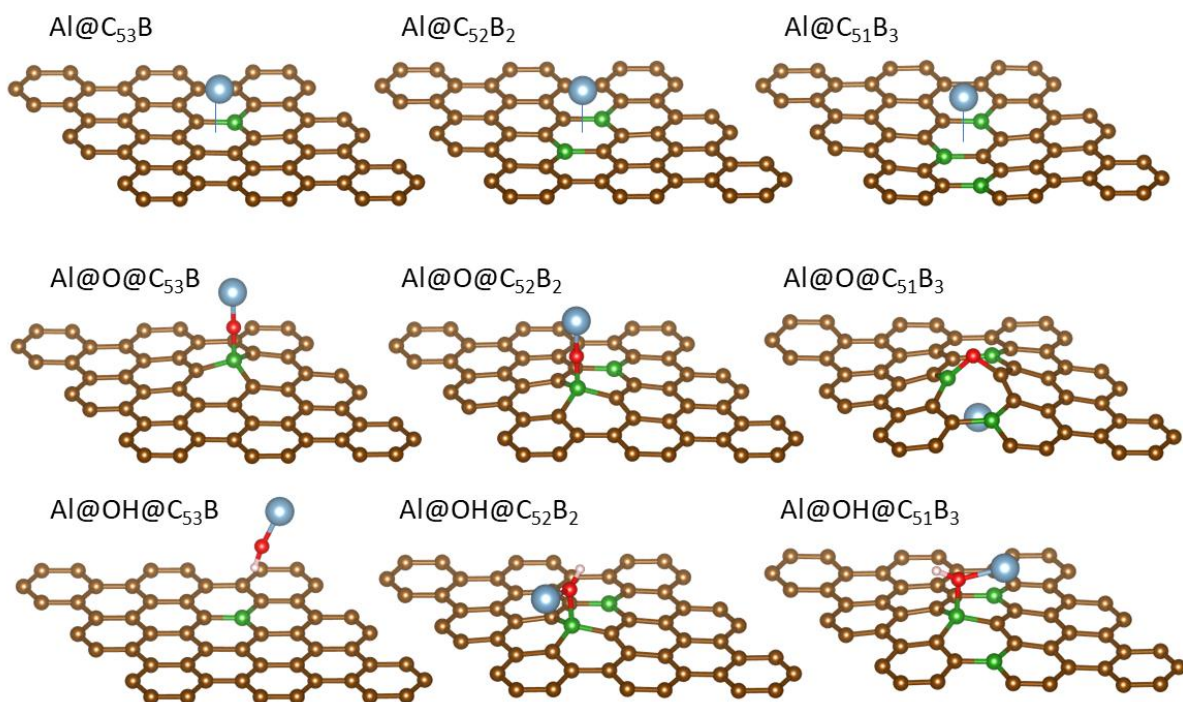

**Fig. S5.** Optimized structures of Al adsorption onto (oxidized) C<sub>54-n</sub>B<sub>n</sub> systems (first row: bare C<sub>54-n</sub>B<sub>n</sub>, middle row C<sub>54-n</sub>B<sub>n</sub> oxidized by O<sub>ads</sub>, bottom row C<sub>54-n</sub>B<sub>n</sub> oxidized by OH<sub>ads</sub>). Graphical representations were made using VESTA.
